# Supplementary material for: Long noncoding RNA SH3PXD2A-AS1 promotes colorectal cancer progression by regulating p53-mediated gene transcription
Source: PubMed Central journal article supplement (PMC8193262; doi:10.7150/ijbs.58422), 2021-05-11
Supplement: ijbsv17p1979s1.pdf [file ijbsv17p1979s1.pdf]

## Supplementary Table and Figures

**Table S1.** Primer sequences used for qRT-PCR.

| <b>Primers for qRT-PCR</b>     |                         |                         |
|--------------------------------|-------------------------|-------------------------|
| Gene name                      | Forward Primer          | Reverse Primer          |
| GAPDH                          | AAGGTCGGAGTCAACGGATTTG  | CCATGGGTGGAATCATATTGGAA |
| 18S rRNA                       | GTAACCCGTTGAACCCATT     | CCATCCAATCGGTAGTAGCG    |
| U6                             | CTCGCTTCGGCAGCACA       | AACGCTTCACGAATTTGCGT    |
| $\beta$ -actin                 | TCGTGCGTGACATTAAGGAG    | ATGCCAGGGTACATGGTGGT    |
| SH3PXD2A-AS1                   | CCACATAGGTCTCACTTA      | AGGTAATTCTTCTCTGATTG    |
| CD82                           | GCTCATTCGAGACTACAACAGC  | GTGACCTCAGGGCGATTCA     |
| CX3CL1                         | ACCACGGTGTGACGAAATG     | TGTTGATAGTGGATGAGCAAAGC |
| GML                            | GTGAGGCTGGGGTATCAAAA    | GCAACATTTCTCTGCGGAACA   |
| DR5                            | GGAGGATTGCGTTGACGAGA    | GGTGTATTTTGTGGGCGCAG    |
| BDKRB2                         | CCGAAAGAAGTCTTGGGAGGT   | CTGGCGTTCCACGGAGATG     |
| ANLN                           | ATCTTGCTGCAACTATTTGCTCC | TCCTGCTTAACACTGCTGCTA   |
| FAS                            | TCTGGTTCTTACGCTCTGTTGC  | CTGTGCAGTCCCTAGCTTTCC   |
| TP53AIP1                       | CTGGCTGGGTTTCAGATCCC    | CAGTGGCCTGTCTCTAAGCA    |
| S100A2                         | GCCAAGAGGGCGACAAGTT     | AGGAAAACAGCATACTCCTGGA  |
| TGFA                           | AGGTCCGAAAACACTGTGAGT   | AGCAAGCGGTTCTTCCCTTC    |
| SCD                            | GCCCCTCTACTTGGAAGACGA   | AAGTGATCCCATAACAGGGCTC  |
| SFN                            | TGACGACAAGAAGCGCATCAT   | GTAGTGAAGACGGAAAAGTTCA  |
| PAI1                           | AAAGGCAACATGACCAGGCT    | ATGCGGGCTGAGACTATGAC    |
| MET                            | AGCAATGGGGAGTGTAAGAGG   | CCCAGTCTTGTACTCAGCAAC   |
| GDF15                          | ACCTGCACCTGCGTATCTCT    | CGGACGAAGATTCTGCCAG     |
| IER3                           | CAGCCGCAGGGTTCTCTAC     | GATCTGGCAGAAGACGATGGT   |
| TRPM2                          | TCCCCGCCGAGTACATACTG    | GTCTGCTCCGATATGAACTTCTC |
| PIG3                           | GGCACAGCTGCTATCCAAC     | AGCATTGCTTGTACTTTGGTGA  |
| PCNA                           | TTGCACGTATATGCCGAGACC   | GGTGAACAGGCTCATTCACTCT  |
| EGFR                           | TTGCCGCAAAGTGTGTAACG    | GTCACCCCTAAATGCCACCG    |
| MDM2                           | GGCAGGGGAGAGTGATACAGA   | GAAGCCAATTCTCACGAAGGG   |
| P2RX6                          | GAACCCCAAGTTTTCCATCATCA | GGCGTCACAAGGAAGTTGGT    |
| CDC25C                         | ATGACAATGGAACTTGGTGGAC  | GGAGCGATATAGGCCACTTCTG  |
| SLC38A2                        | ACCGCAGCCGTAGAAGAATG    | GCCAGACGGACAATGAGAAGAA  |
| GADD45A                        | GAGAGCAGAAGACCGAAAGGA   | CAGTGATCGTGCCTGACT      |
| RRM2B                          | ATTGGGCCTTGCGATGGATAG   | GAGTCCTGGCATAAGACCTCT   |
| <b>Primers for CHIP assays</b> |                         |                         |
| Gene name                      | Forward Primer          | Reverse Primer          |
| CD82                           | ACTGGTTGTTCTGGGCTACTTC  | TGAATCTCATGGAGGCGGG     |
| CX3CL1                         | TGCTGGCCTTTTGTGTGTTG    | CAAGCTGGGAACATGCCCTA    |
| DR5                            | ACACATAAATCAGCACGCGG    | GTAGATCGGGCATCGTCGG     |
| IER3                           | TGTGAGGGATCCTGTGGCTA    | CTGCACGTTGTGAGTGTGTG    |

|       |                       |                      |
|-------|-----------------------|----------------------|
| SCD   | CGGGACGGAGATGTTAGTGG  | TCGGGAGCTTTCTCTCTGGA |
| MET   | CGATTTCCCTCTGGGTGGTG  | CCCAGCACGTGTCTGTCTG  |
| PCNA  | ATAAAGCTGGGGCTTGACGA  | CCGCCTCTTTGACTCCTGAA |
| SFN   | AGACACAGAGTCCGGCATTG  | CAGCTTGGCCTTCTGGATCA |
| GDF15 | CAGCATCTGGTCAGTCCCAG  | TCACCGTCCTGAGTTCTTGC |
| TGFA  | GACGGTAGCCGCCTTCCTATT | GTGCGGGGGAAAAAGACG   |

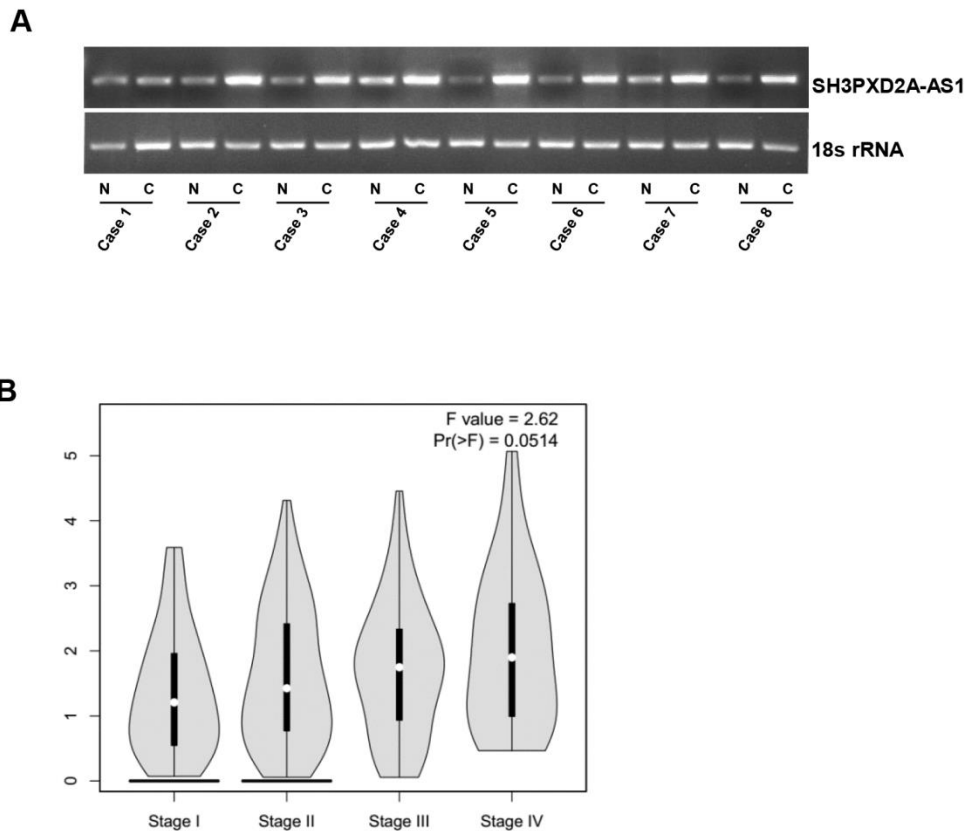

**Figure S1.** SH3PXD2A-AS1 is overexpressed in CRC tissues. **(A)** SH3PXD2A-AS1 is upregulated in CRC tissues detected by RT-PCR running on gel electrophoresis by using paired colon tissues. **(B)** SH3PXD2A-AS1 expression in different stages of CRC in TCGA database analyzed in the GEPIA website (<http://gepia.cancer-pku.cn/index.html>).

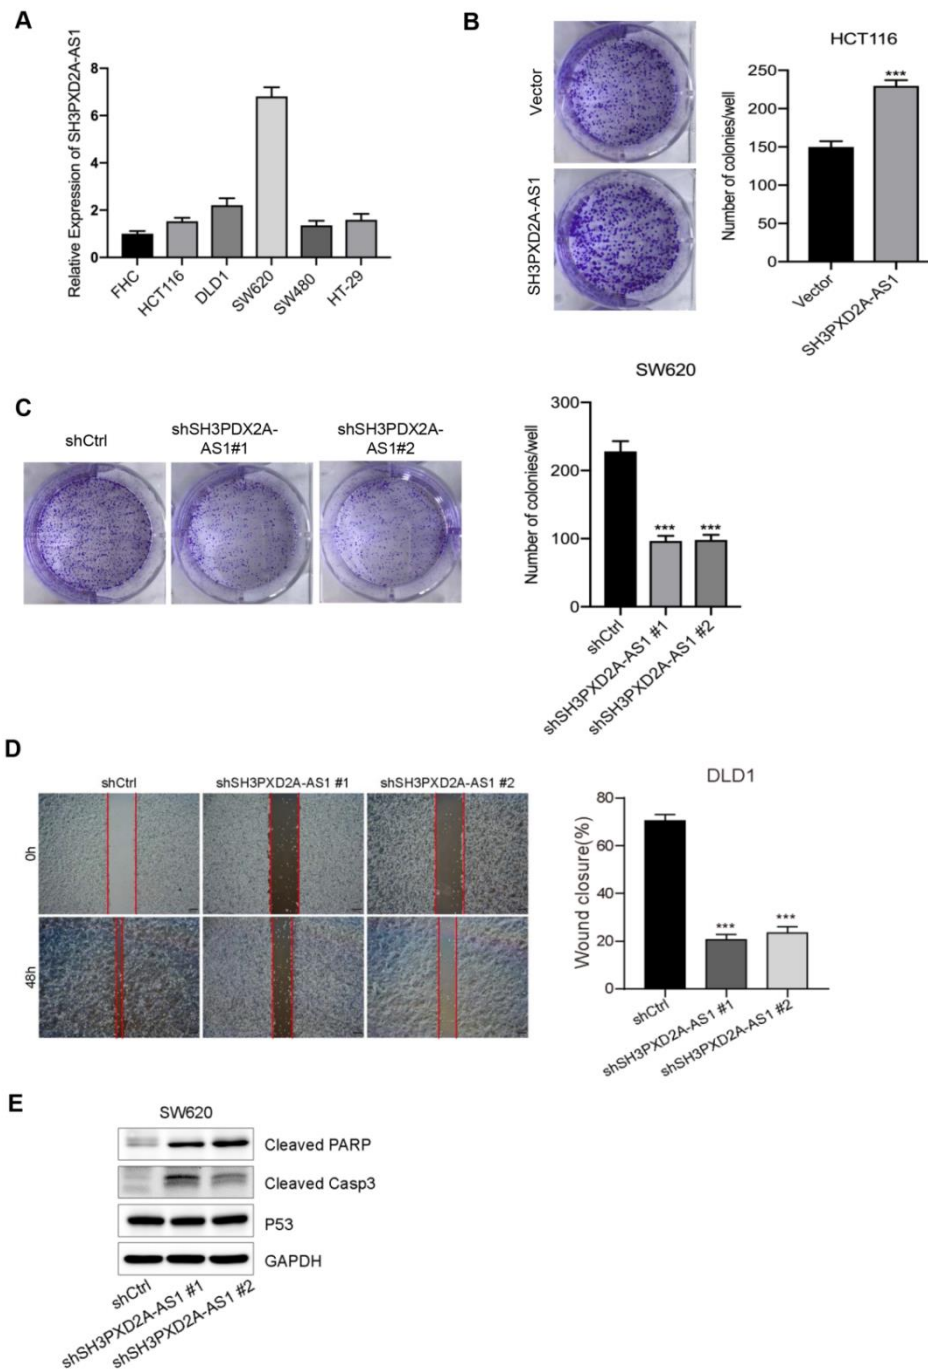

**Figure S2.** SH3PXD2A-AS1 promotes CRC proliferation and migration. **(A)** SH3PXD2A-AS1 expression was detected in CRC cell lines and the normal colon cell line, FHC. **(B-C)** SH3PXD2A-AS1 promotes CRC cells colony formation. **(D)** SH3PXD2A-AS1 Knockdown inhibits wound healing in DLD1 cell. **(E)** SH3PXD2A-AS1 knockdown increases the expression of cleaved PARP and cleaved casp3. \*\*\* $p < 0.001$  by two-tailed Student's *t* test.

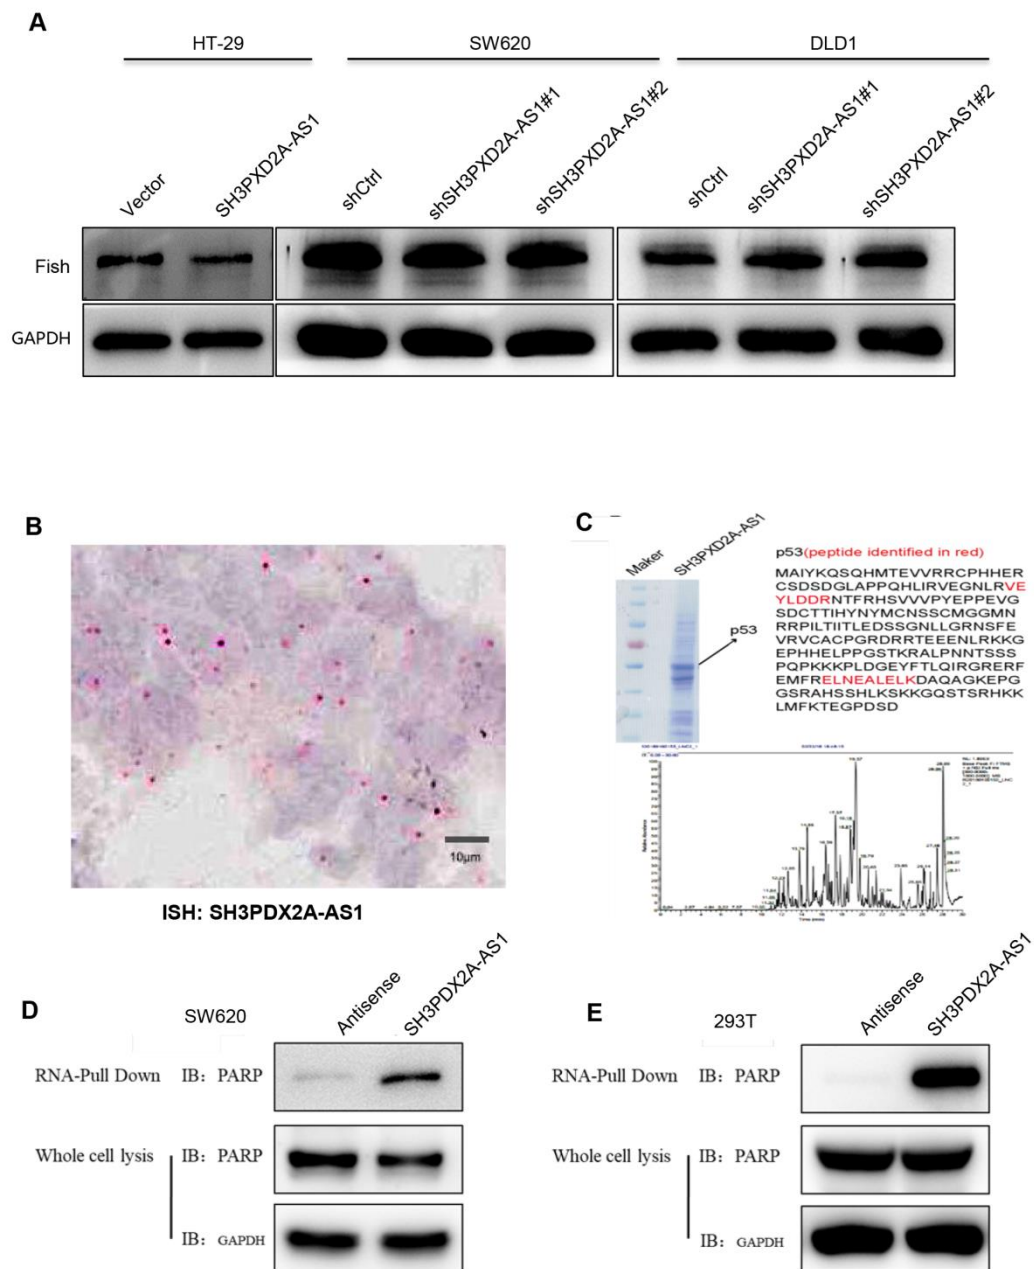

**Figure S3.** SH3PXD2A-AS1 can also interact with PARP. (A) SH3PXD2A-AS1 did not affect the protein expressions of the neighbor gene, Fish (B) RNA-ISH showed SH3PXD2A-AS1 located both in the nuclei and the cytoplasm CRC tissues. (C) Mass spectrum analysis of SH3PXD2A-AS1 binding proteins. (D-E) Biotin-RNA pull-downs followed by Western-blot by using Anti-PARP in SW620 and 293T cells.

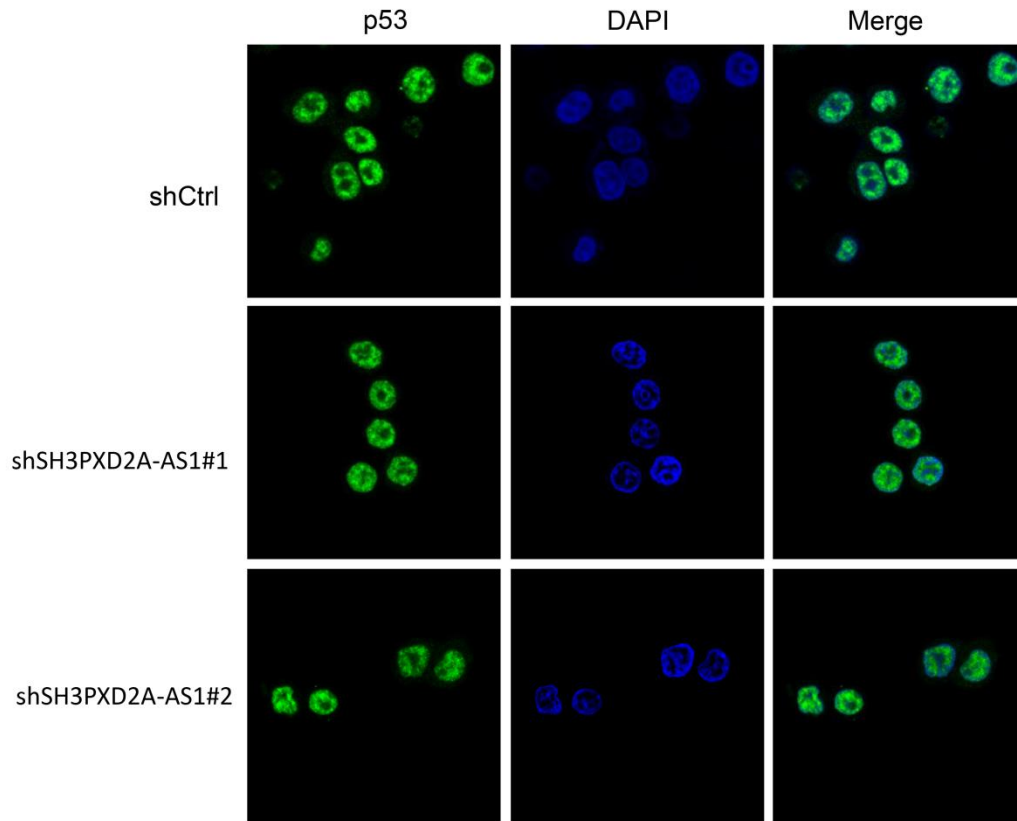

**Figure S4.** SH3PXD2A-AS1 Knockdown did not affect the distribution of p53 in nucleus or cytoplasm. Immunofluorescence of p53 in shCtrl、shSH3PXD2A-AS1#1 and SH3PXD2A-AS1#2 SW620 cells.

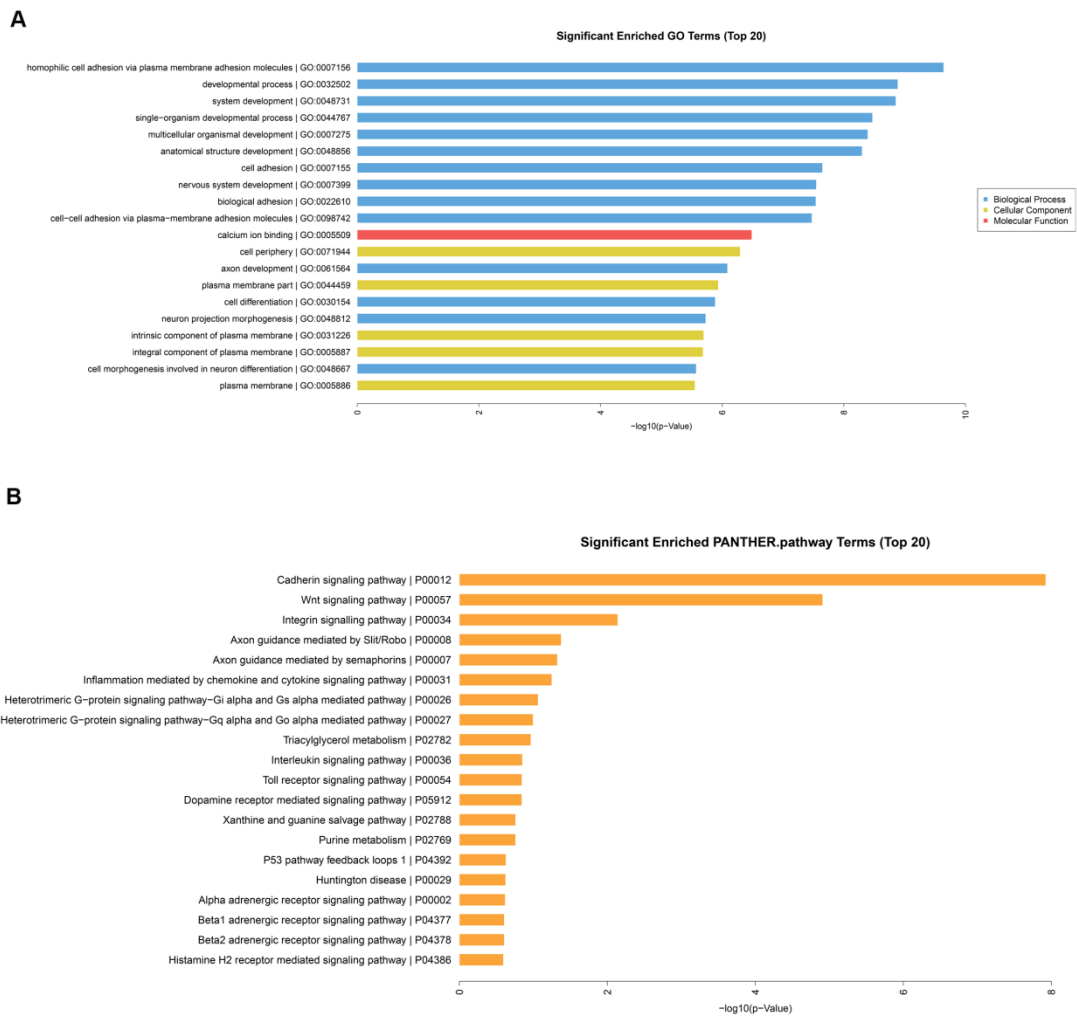

**Figure S5.** Gene ontology analysis of SH3PXD2A-AS1 related pathways by using RNA-seq data. (A-B) Differentially expressed genes defined by functionally enriched gene ontology (GO) terms and pathways involved in cadherin signaling pathway, Wnt signaling pathway and P53 pathway

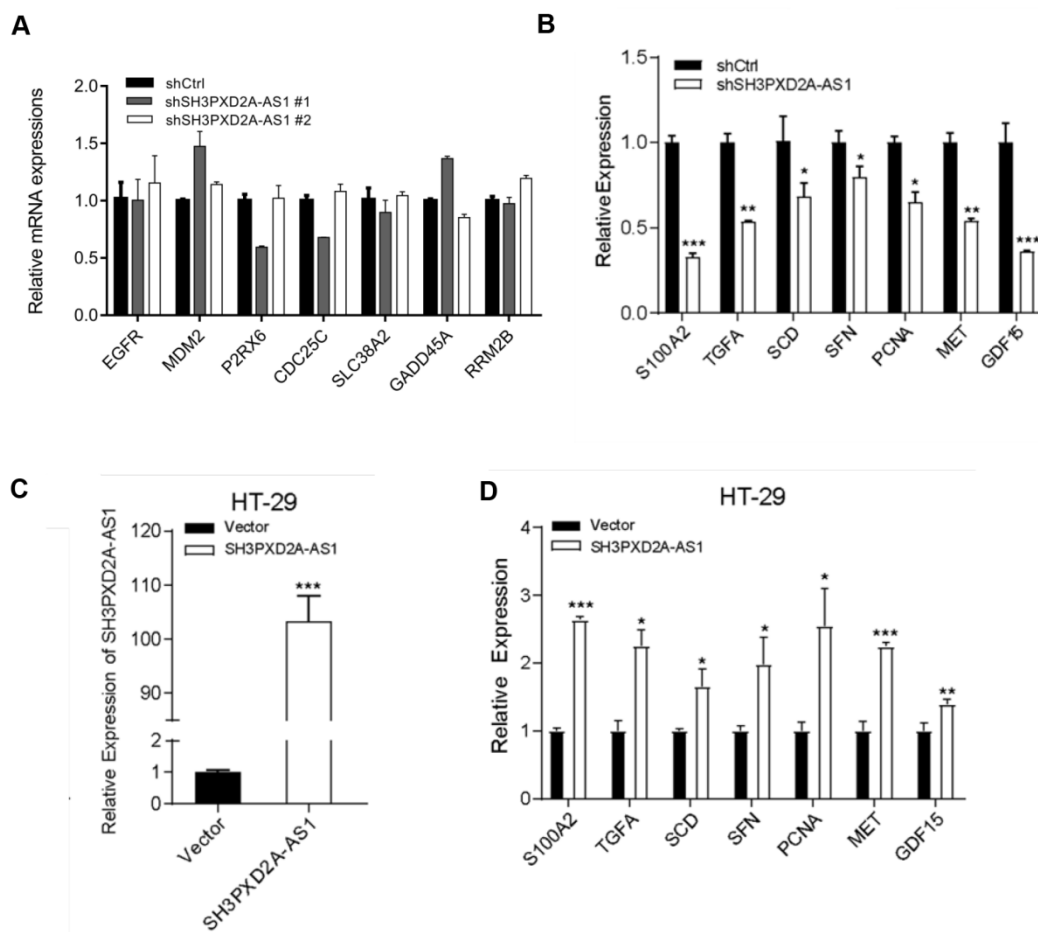

**Figure S6.** SH3PXD2A-AS1 regulates p53 target genes. (A) Relative mRNA expressions of p53 targets those not changed in SH3PXD2A-AS1 knockdown SW620 cells. (B) Relative mRNA levels of several p53 targets in xenograft tumors. (C-D) Relative mRNA levels of several p53 targets in SH3PXD2A-AS1 overexpression HT29 cells.

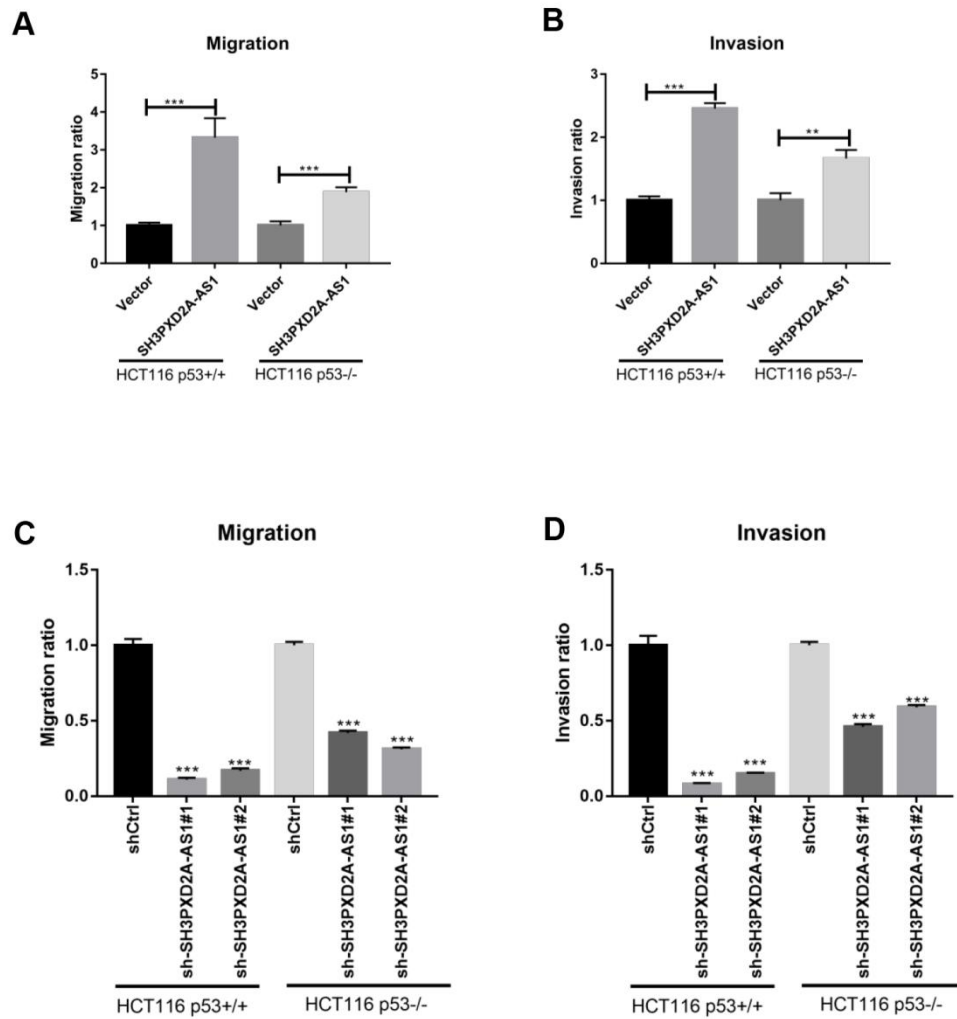

**Figure S7.** Effects of SH3PXD2A-AS1 on cell migration and invasion in p53<sup>-/-</sup> HCT116 cells. (A-D) Effects of SH3PXD2A-AS1 overexpression or knockdown on cell migration and invasion in p53<sup>-/-</sup> HCT116 cells. \*\*p<0.01 and \*\*\*p < 0.001 by two-tailed Student's t test.



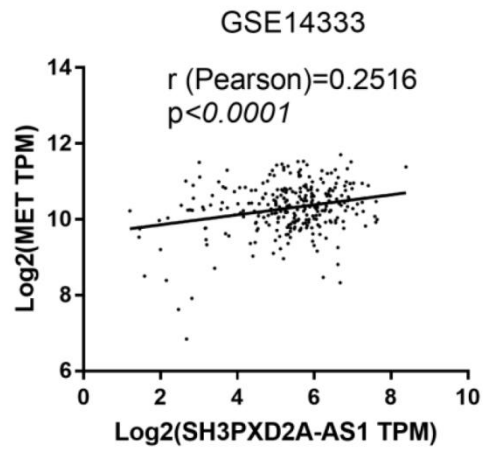

**Figure S8.** Correlation analysis of relative mRNA levels of SH3PXD2A-AS1 and MET by using the GEO dataset (GSE14333).
